# Supplementary material for: Semiconducting polymer dots as broadband saturable absorbers for Q-switched fiber lasers
Source: Royal Society of Chemistry journal article supplement (doi:10.1039/c9tc06599g), 2020-01-01
Supplement: c9tc06599g1.pdf [file c9tc06599g1.pdf]

- Electronic Supplementary Material (ESI) -

## Semiconducting Polymer Dots as Broadband Saturable Absorbers for Q-switched Fiber Lasers

Haobin Chen,<sup>a,b</sup> Fang Wang,<sup>\*a</sup> Mengdan Qian,<sup>b</sup> Xue Zhou,<sup>a</sup> Zhenrui Li,<sup>b</sup> Tonglei Cheng<sup>a</sup> and  
Guanshi Qin,<sup>\*b</sup>

<sup>a</sup> State Key Laboratory of Synthetical Automation for Process Industries, the College of Information Science and Engineering, Northeastern University, Shenyang, 110819, China. E-mail: wangfangzzh@163.com

<sup>b</sup> State Key Laboratory of Integrated Optoelectronics, College of Electronic Science and Engineering, Jilin University, Changchun, Jilin 130012, China. E-mail: qings@jlu.edu.cn

## Supplementary Figures

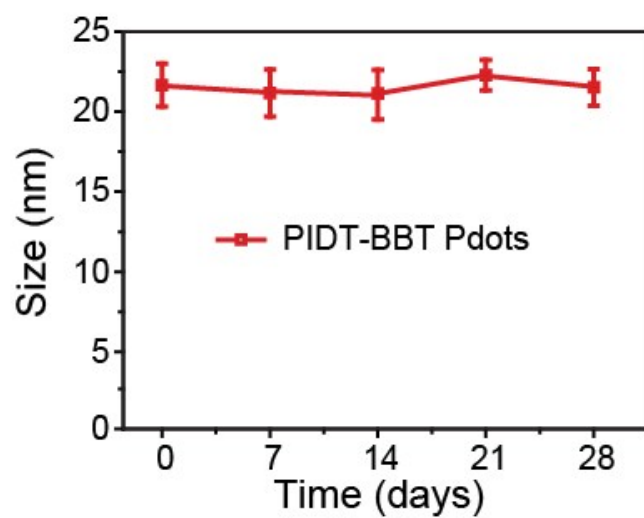

**Fig.S1** The hydrodynamic diameters of PIDT-BBT Pdots as a function of storage time.

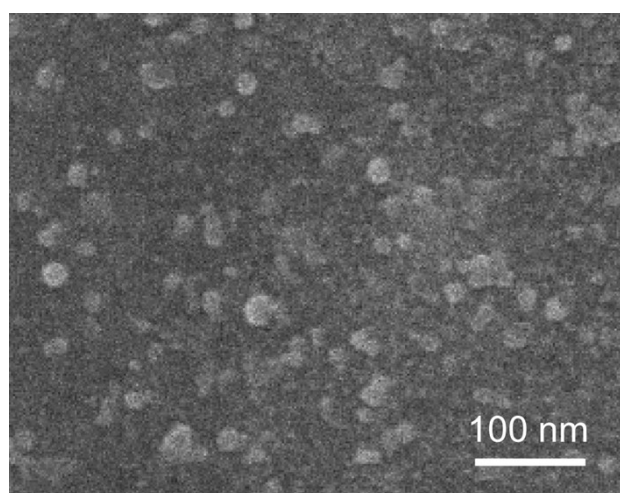

**Fig. S2** The SEM image of the Pdots.

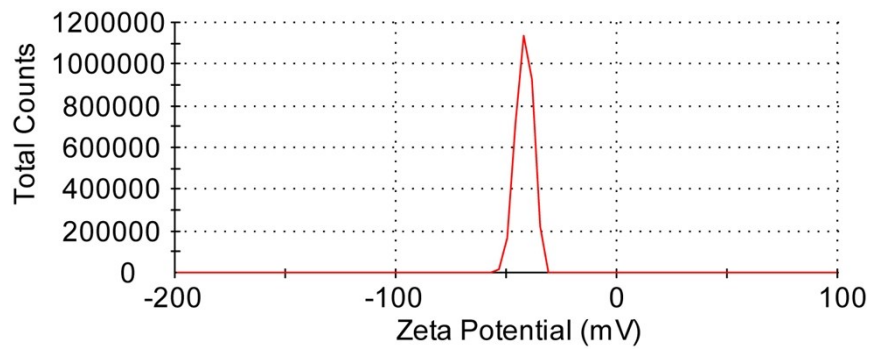

Fig. S3 Zeta-potential of the Pdots.

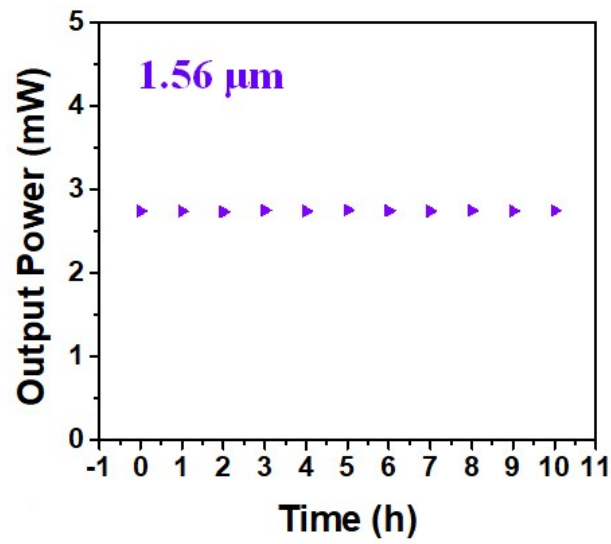

Fig. S4. Output power of the Q-switched lasers at 1.56  $\mu\text{m}$  for the pump power of 118 mW at 1 h interval.

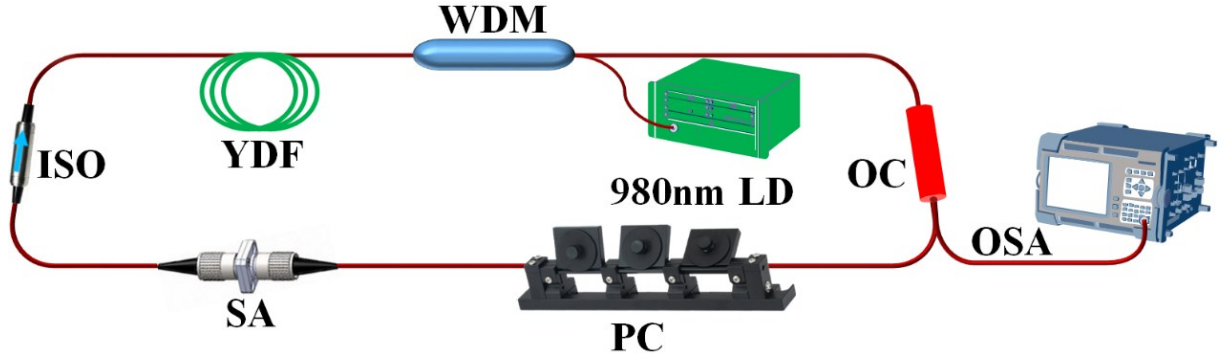

**Fig. S5** Experimental setup of the ytterbium-doped fiber laser ring cavity.

The pump light was a 980nm laser diode (LD), which would be launched into the cavity through a 980/1060 nm wavelength-division multiplexing (WDM) coupler. A 20cm-long ytterbium-doped fiber (YDF) was utilized as the gain medium. An isolator (ISO) was added to avoid any harmful feedbacks. A polarization controller (PC) was put in the cavity for the optimum polarization state. The 10 dB optical coupler (OC) was adopted to output 10% of the laser and the rest continued propagating in the cavity. The Pdots-SA film was integrated between the fiber connectors. The output end of the 10 dB OC was connected to an optical spectrum analyzer (OSA) to present the laser spectrum.

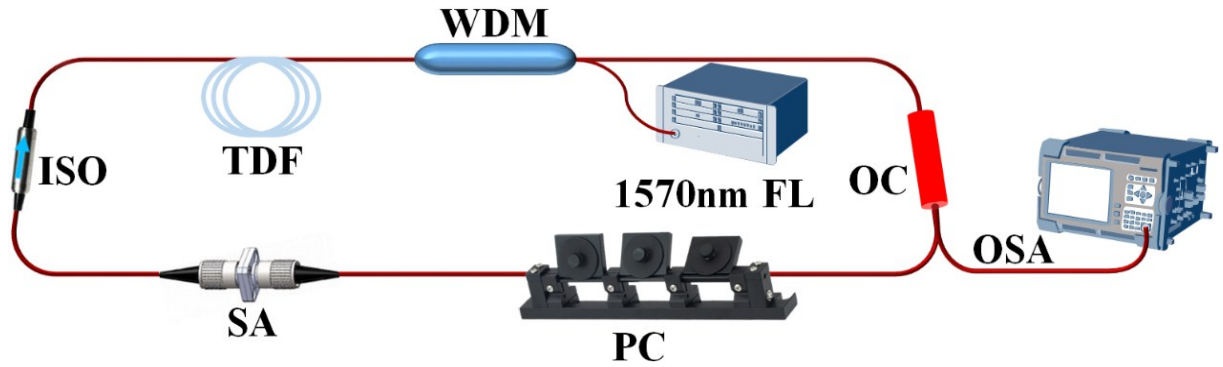

**Fig. S6** Experimental setup of the thulium-doped fiber laser ring cavity.

The pump light was a 1570 nm fiber laser (FL), which would be launched into the cavity through a 1550/2000 nm WDM coupler. A 20cm-long thulium-doped fiber (TDF) was utilized as the gain medium. An ISO was added to avoid any harmful feedbacks. A PC was put in the cavity for the optimum polarization state. The 10 dB OC was adopted to output 10% of the laser and the rest continued propagating in the cavity. The Pdots-SA film was integrated between the fiber connectors. The output end of the 10 dB OC was connected to an OSA to present the laser spectrum.

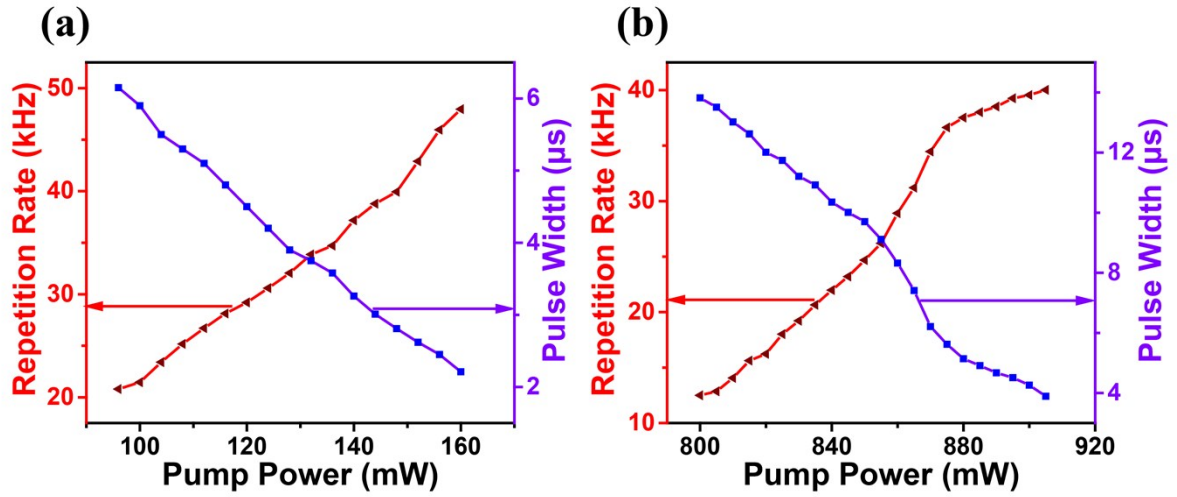

**Fig. S7** (a, b) Pulse width (brown) and repetition rate (red) versus incident pump power, of Q-switched YDFL (a) and TDFL (b), respectively.

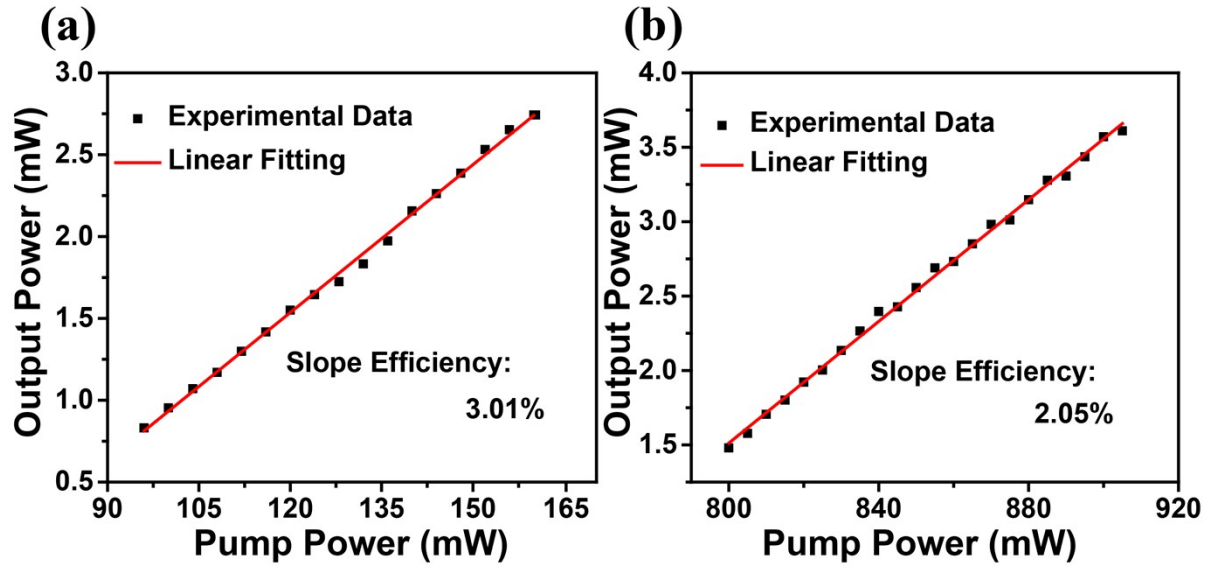

**Fig. S8** (a) Output power of the Q-switched Yb-doped fiber laser as a function of the pump power. (b) Output power of the Q-switched Tm-doped fiber laser as a function of the pump power.

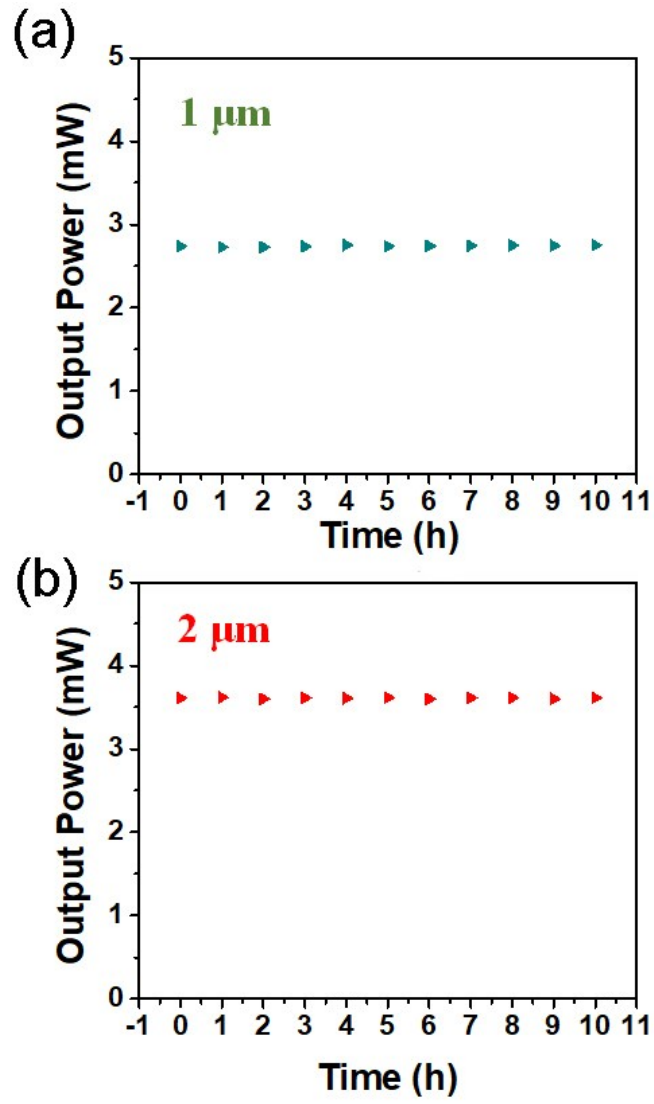

Fig. S9. Output power of the Q-switched lasers at 1  $\mu\text{m}$  (a) and 2  $\mu\text{m}$  (b) for the pump power of 160 and 905 mW at 1 h interval, respectively.
